# Supplementary material
Source: publisher site journal article supplement (https://www.dovepress.com/article/493145)
Supplement: Supplementary file 1 [file get_supplementary_file.php]

**Supplementary Materials**

**Supplemental Table 1.** The details of the patients' backgrounds

| Cases no. | n=1155 |
| --- | --- |
| Gender (male: female) | 226: 929≈1: 4 |
| Age (y/o) | 52.87 ± 11.53 |
| Disease course (y) | 7.40 (range from 0.1 to 65) |
| Visiting times (in one year) | 5.18 (range from 1 to 21) |


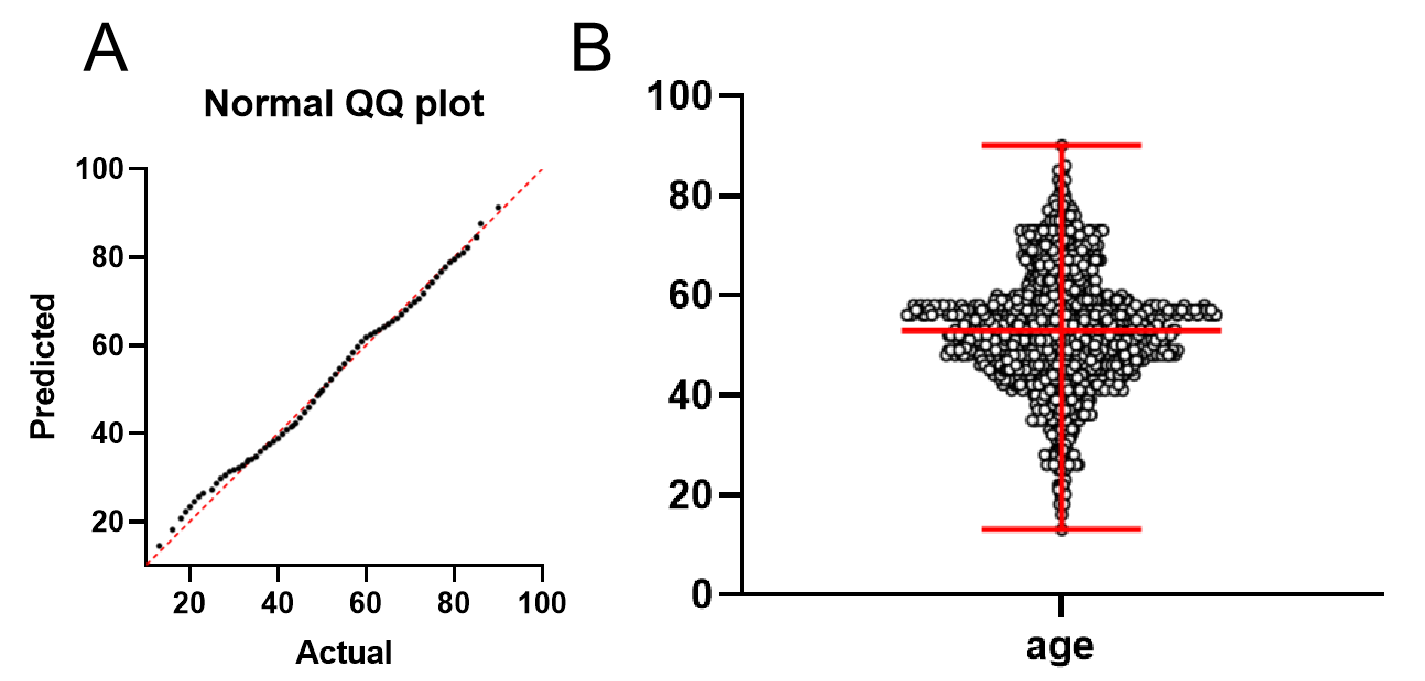


**Supplemental figure 1.** (A) The QQ plot and (B) scatter plot shows that the age (mean with range) is of normal distribution.


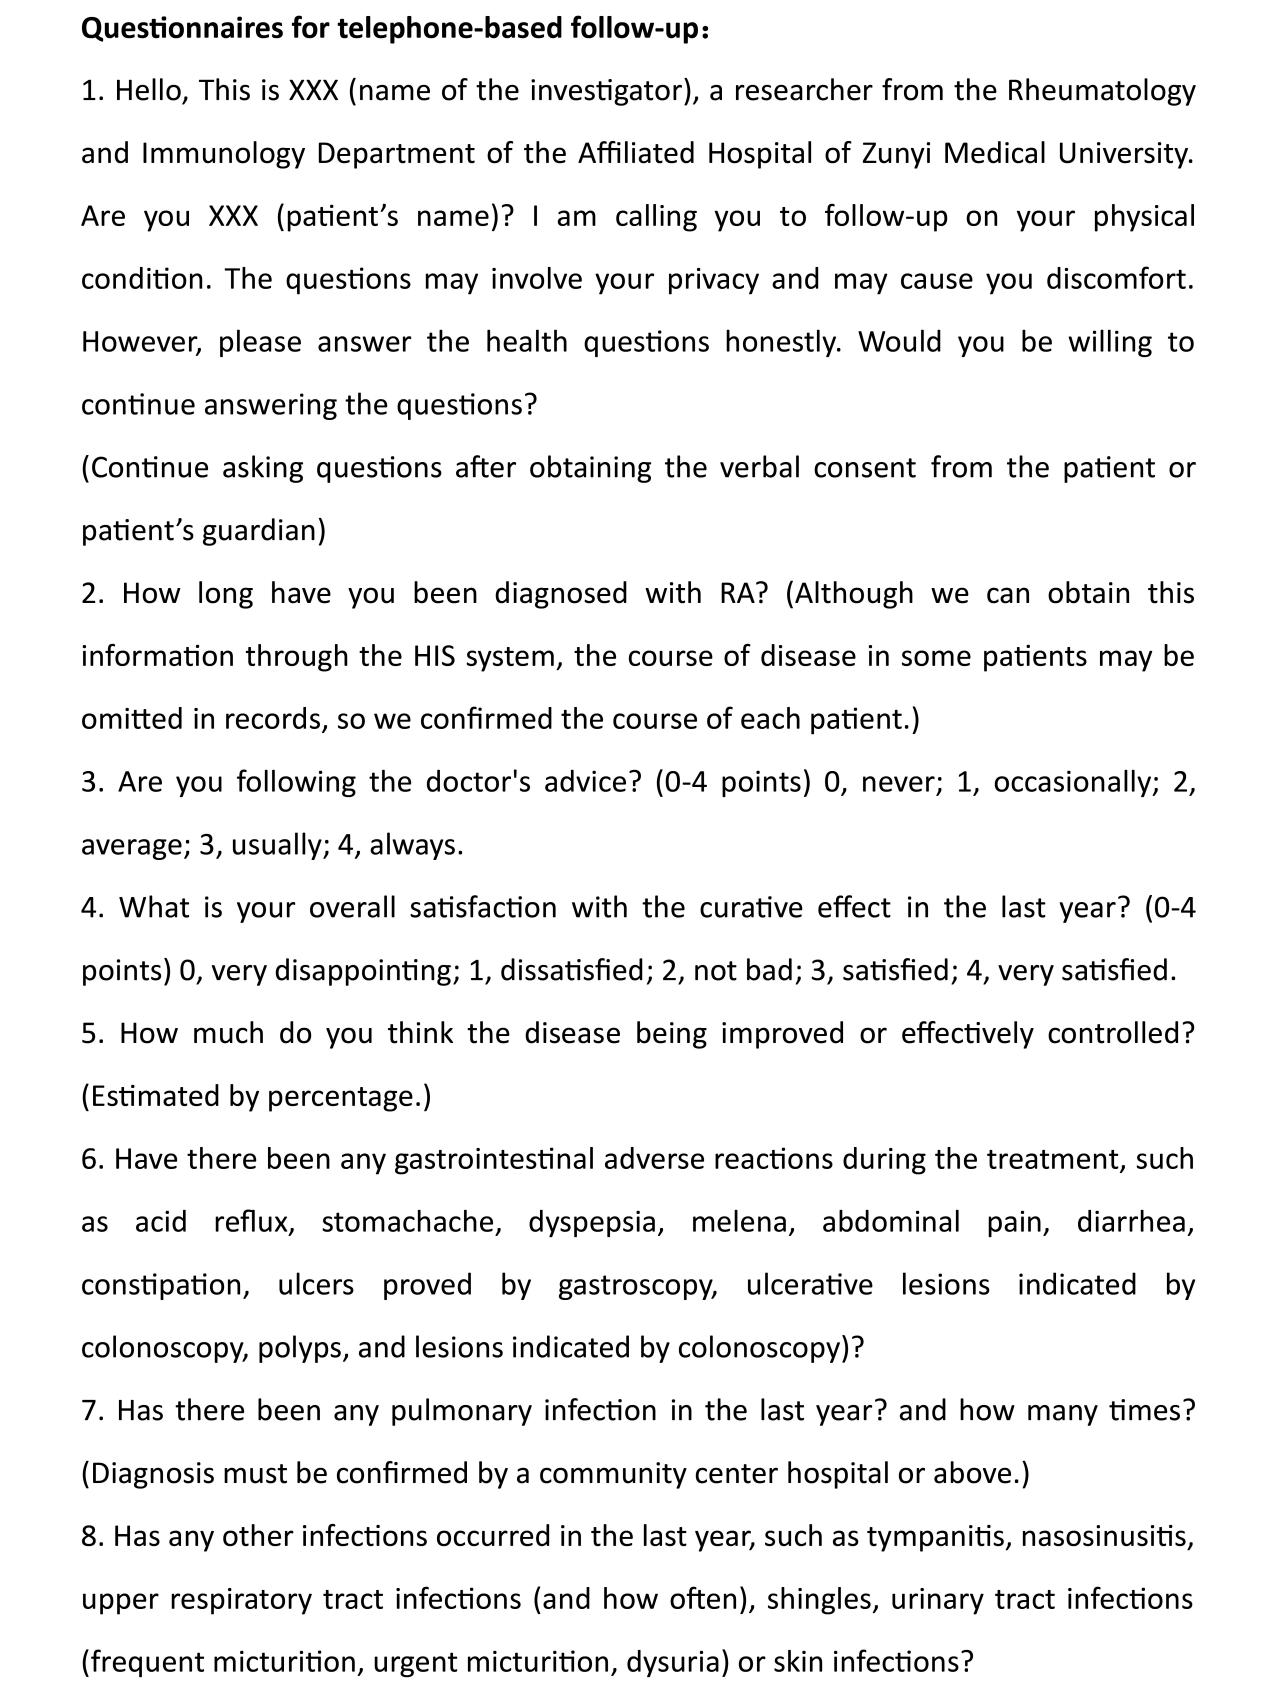


**Supplemental figure 2.** Questionnaires for telephone-based follow-up.
